# Supplementary material for: Metagenomics analysis reveals features unique to Indian distal gut microbiota
Source: PLoS One. 2020 Apr 8;15(4):e0231197. doi: 10.1371/journal.pone.0231197 (PMC7141701; doi:10.1371/journal.pone.0231197)
Supplement: S1 Table — (XLSX) [file pone.0231197.s006.xlsx]

## Sheet: S1 Table
S1 Table: Metadata Information of Indian Samples
		KHARGONE												JAISALMER										LADAKH									Average
	Sample Id	IND_1	IND_2	IND_3	IND_4	IND_5	IND_6	IND_7	IND_8	IND_9	IND_10	IND_11	IND_12	JAS_1	JAS_2	JAS_3	JAS_4	JAS_5	JAS_6	JAS_7	JAS_8	JAS_9	JAS_10	LDK_1-2	LDK_2	LDK_3	LDK_4	LDK_5	LDK_6	LDK_7	LDK_8	LDK_9	Average Khargone	SEM Khargone	Average Jaisalmer	SEM Jaisalmer	Average Ladakh	SEM Ladakh	Average overall	SEM overall
	Gender	Male	Male	Male	Male	Male	Male	Male	Male	Male	Male	Male	Male	Male	Male	Male	Female	Male	Male	Male	Female	Male	Male	Female	Male	Male	Male	Male	Male	Male	Male	Male
	Age (years)	31	33	45	22	28	19	35	27	29	33	35	24	32	35	58	55	32	18	22	37	20	20	56	23	50	36	31	46	44	29	40	30.0833	2.00174	32.9	4.49061	39.4444	3.55946	33.7097	1.99903
	Height (in feet and inches)	5'6''	5'9''	5'7''	5'6''	5'7''	5'6''	5'4''	5'8''	5'6''	5'5''	5'	5'9''	5'8''	5'7''	5'9''	5'4''	5'11''	5'6''	5'9''	5'	5'6''	5'7''	5'4"	5'2"	5'5''	5'3''	5'2''	5'2''	5'6''	5'2''	5'4''
	Height (in inches)	66	69	67	66	67	66	64	68	66	65	60	69	68	67	69	64	71	66	69	60	66	67	64	62	65	63	62	62	66	62	64	66.0833	0.701279	66.7	0.966667	63.3333	0.5	65.4839	0.494857
	Height (in m)	1.6764	1.7526	1.7018	1.6764	1.7018	1.6764	1.6256	1.7272	1.6764	1.651	1.524	1.7526	1.7272	1.7018	1.7526	1.6256	1.8034	1.6764	1.7526	1.524	1.6764	1.7018	1.6256	1.5748	1.651	1.6002	1.5748	1.5748	1.6764	1.5748	1.6256	1.67852	0.0178125	1.69418	0.0245533	1.60867	0.0127	1.66329	0.0125694
	Weight (in kgs)	56	92	60	65	68	43	60	70	64	60	55	75	70	72	70	55	54	63	56	43	53	60	58	50	70	50	60	63	68	70	70	64	3.47284	59.6	2.91814	62.1111	2.73071	62.0323	1.79634
	BMI	19.9266	29.9518	20.7174	23.1291	23.4797	15.3008	22.7051	23.4646	22.7732	22.0119	23.6806	24.4172	23.4646	24.8608	22.7894	20.813	16.6039	22.4174	18.2315	18.5139	18.8591	20.7174	21.9483	20.1613	25.6805	19.5264	24.1936	25.4033	24.1966	28.2259	26.4893	22.6298	0.971823	20.7271	0.838753	23.9806	0.97096	22.4082	0.574514
	Blood Group	N.K.	B	N.K.	O	O	N.K.	N.K.	AB	O	N.K.	N.K.	O	A	N.K.	B	N.K.	N.K.	N.K.	N.K.	N.K.	N.K.	N.K.	N.K.	AB	N.K.	B	O	O	A	N.K.	A
	RH Type	N.K.	+'	N.K.	+'	+'	N.K.	N.K.	+'	+'	N.K.	N.K.	+'	+'	N.K.	+'	N.K.	N.K.	N.K.	N.K.	N.K.	N.K.	N.K.	N.K.	+'	N.K.	+'	+'	+'	+'	N.K.	+'
	Smoking habit	NO	NO	NO	NO	NO	NO	NO	NO	NO	NO	NO	NO	NO	NO	NO	NO	NO	NO	NO	NO	NO	NO	No	No	No	No	No	No	No	No	No
	Consumption of alcoholic beverages	NO	NO	Yes	NO	NO	NO	NO	NO	NO	Yes	NO	NO	NO	NO	NO	NO	NO	Yes	NO	NO	NO	NO	No	No	Yes	Yes	No	Yes	Yes	No	Yes
	Drug/Tobacco products	NO	Tabacco(10-12 times/week)	paan masala(10-14 sachet/week)	NO	paan masala(10-14 sachet/week)	paan masala(10-14 sachet/week)	NO	paan masala(10-14 sachet/week)	paan masala occasionally	NO	NO	NO	NO	NO	NO	NO	paan masala(1-2sachet/week)	paan masala(14-15sachet/week	NO	NO	NO	NO	No	No	No	No	No	No	No	No	No
	Physical Activity	Low	Moderate	Low	Moderate	Low	Low	Low	High	Low	High	Low	Moderate	Low	High	Moderate	Moderate	Moderate	High	Low	Moderate	Low	Low	Moderate	Low	High	High	Moderate	High	High	High	High
	Exposure to sunlight	1-4 hours	1-4 hours	1-4 hours	1-4 hours	1-4 hours	1-4 hours	1-4 hours	more than 4 hours	Upto 1	More than 4 hours	Upto 1	1-4 hours	More than 4 hours	More than 4 hours	Upto 1	1-4hours	1-4hours	More than 4 hours	Upto 1	1-4 hours	1-4 hours	Upto 1	1-4 hours	1-4 hours	More than 4 hrs	More than 4 hrs	More than 4 hrs	More than 4 hrs	More than 4 hrs	More than 4 hrs	More than 4 hrs
	Regular Bowel Movement	Yes	Yes	Yes	Yes	Yes	Yes	Yes	Yes	Yes	Yes	Yes	Yes	Yes	Yes	Yes	Yes	Yes	Yes	Yes	Yes	Yes	Yes	Yes	Yes	Yes	Yes	Yes	Yes	Yes	Yes	Yes
	constipation/diarrhoea within the last two weeks	No	No	No	No	No	No	No	No	No	No	No	No	No	No	No	No	No	No	No	No	No	No	No	No	No	No	No	No	No	No	No
	Symptoms of IDB/Ulcerative colitis/other diseases of digestive system	No	No	No	No	No	No	No	No	No	No	No	No	No	No	No	No	No	No	No	No	No	No	No	No	No	No	No	No	No	No	No
	Diseases of urogenital system	No	No	No	No	No	No	No	No	No	No	Gall stone	No	No	No	No	No	No	No	No	No	No	No	No	No	No	No	No	No	No	No	No
	Diseases of Cardiovascular system	No	No	No	No	No	No	No	No	No	No	No	No	No	No	No	No	No	No	No	No	No	No	No	No	No	No	No	No	No	No	No
	Diseases of Nervous system/Bones/Muscles	Accident 9 years ago (leg fracture)	No	No	No	No	No	In 2009, bone fracture,foot operation	No	No	No	No	No	No	No	No	No	No	No	No	No	No	No	Joint Pain	No	No	No	No	No	No	No	No
	Sleep Disorder	No	No	No	No	No	No	No	No	No	No	No	No	No	No	No	No	No	No	No	No	No	No	No	No	No	No	No	No	No	No	No
	Cancer	No	No	No	No	No	No	No	No	No	No	No	No	No	No	No	No	No	No	No	No	No	No	No	No	No	No	No	No	No	No	No
	Allergy/Asthma	No	No	No	No	No	No	Occasional breathlessness	No	No	No	No	No	No	No	No	No	No	No	No	No	No	No	No	No	Dust	No	No	No	No	No	No
	Skin diseases	No	No	No	No	No	No	No	No	No	No	No	No	No	No	No	No	No	No	No	No	No	No	No	No	No	No	No	No	No	No	No
	Particulars of any medicines taken in the last one week	N.A.	N.A.	N.A.	N.A.	N.A.	N.A.	N.A.	N.A.	N.A.	N.A.	N.A.	N.A.	N.A.	N.A.	N.A.	N.A.	N.A.	N.A.	N.A.	N.A.	N.A.	N.A.	N.A.	N.A.	N.A.	N.A.	N.A.	N.A.	N.A.	Digene(1-2times one month ago	N.A.
	Date of most recent antibiotic treatment, particulars of antibiotic and disease treated (within last six months)	N.A.	N.A.	N.A.	N.A.	N.A.	N.A.	N.A.	N.A.	N.A.	N.A.	N.A.	N.A.	N.A.	N.A.	N.A.	N.A.	N.A.	N.A.	N.A.	N.A.	N.A.	N.A.	N.A.	N.A.	N.A.	N.A.	N.A.	N.A.	N.A.	N.A.	N.A.
	Number of meals and snacks per day	3	3	3	3	3	4	2	2	2	3	2	2	2	2	2	2	2	3	3	2	2	2	4	4	3	3	3	3	3	3	3
	Number of home cooked meals	All	All	All	All	All	All	All	All	All	All	All	All	All	All	All	All	All	All	2home+1hotel	All	All	All	All	All	All	All	All	All	All	All	All
	Kind of cuisine or food preparations usually eaten	North indian	North indian	North indian	North indian	North indian	North indian	North indian	North indian	North indian	North indian	North indian	North indian	Rajasthani	Rajasthani	Rajasthani	Rajasthani	Rajasthani	Rajasthani	Rajasthani	Rajasthani	Rajasthani	Rajasthani	Ladakhi	Ladakhi	Ladakhi	Ladakhi	Ladakhi	Ladakhi	Ladakhi	Ladakhi	Ladakhi
	Dairy products in diet	Yes	Yes	Yes	Yes	Yes	Yes	Yes	No	Yes	Yes	Yes	Yes	Yes	Yes	Yes	Yes	Yes	Yes	Yes	Yes	Yes	Yes	Yes	Yes	Yes	Yes	Yes	Yes	Yes	Yes	Yes
	Egg in diet	Yes	Yes	Yes	Yes	No	No	No	No	No	No	No	No	No	No	No	No	No	Yes	No	No	No	No	Yes	Yes	No	Yes	Yes	Yes	Yes	Yes	Yes
	Poultry in diet	Yes	No	Yes	No	Yes	Yes	Yes	No	No	No	No	No	No	No	No	No	No	Yes	No	No	No	No	No	No	No	Yes	No	Yes	No	Yes	No
	Red meat in diet	Yes	Yes	No	No	Yes	Yes	Yes	Yes	No	Yes	No	Yes	Yes	No	Yes	Yes	Yes	No	Yes	No	No	No	Yes	Yes	Yes	Yes	No	Yes	Yes	No	No
	Fish in diet	Yes	No	No	No	No	No	No	No	No	No	No	No	No	No	No	No	No	No	No	No	No	No	No	No	Yes	Yes	No	No	No	No	No
	Date of sample collection	25th November 2014	26th November 2014	26th November 2014	26th November 2014	26th November 2014	26th November 2014	26th November 2014	26th November 2014	26th November 2014	26th November 2014	26th November 2014	26th November 2014	9th November 2014	9th November 2014	9th November 2014	9th November 2014	9th November 2014	9th November 2014	9th November 2014	9th November 2014	9th November 2014	9th November 2014	27th October 2013	27th October 2013	27th October 2013	27th October 2013	27th October 2013	27th October 2013	27th October 2013	27th October 2013	27th October 2013
	Time of sample collection	09:00:00	09:00:00	09:00:00	09:00:00	09:00:00	09:00:00	09:00:00	09:00:00	09:00:00	09:00:00	09:00:00	09:00:00	09:00:00	09:00:00	09:00:00	09:00:00	09:00:00	09:00:00	09:00:00	09:00:00	09:00:00	09:00:00	09:00:00	09:00:00	09:00:00	09:00:00	09:00:00	09:00:00	09:00:00	09:00:00	09:00:00
	Place of sample collection	Pipliya Buzurg village, Khargone, M.P., India	Pipliya Buzurg village, Khargone, M.P., India	Pipliya Buzurg village, Khargone, M.P., India	Pipliya Buzurg village, Khargone, M.P., India	Pipliya Buzurg village, Khargone, M.P., India	Pipliya Buzurg village, Khargone, M.P., India	Pipliya Buzurg village, Khargone, M.P., India	Pipliya Buzurg village, Khargone, M.P., India	Pipliya Buzurg village, Khargone, M.P., India	Pipliya Buzurg village, Khargone, M.P., India	Pipliya Buzurg village, Khargone, M.P., India	Pipliya Buzurg village, Khargone, M.P., India	Khuri village, Jaisalmer, Rajasthan, India	Khuri village, Jaisalmer, Rajasthan, India	Khuri village, Jaisalmer, Rajasthan, India	Khuri village, Jaisalmer, Rajasthan, India	Khuri village, Jaisalmer, Rajasthan, India	Khuri village, Jaisalmer, Rajasthan, India	Khuri village, Jaisalmer, Rajasthan, India	Khuri village, Jaisalmer, Rajasthan, India	Khuri village, Jaisalmer, Rajasthan, India	Khuri village, Jaisalmer, Rajasthan, India	Skur Buchan Village, Ladakh, J&K, India	Skur Buchan Village, Ladakh, J&K, India	Skur Buchan Village, Ladakh, J&K, India	Skur Buchan Village, Ladakh, J&K, India	Skur Buchan Village, Ladakh, J&K, India	Skur Buchan Village, Ladakh, J&K, India	Skur Buchan Village, Ladakh, J&K, India	Skur Buchan Village, Ladakh, J&K, India	Skur Buchan Village, Ladakh, J&K, India
	Approx. geographical coordinates	22.226704° N, 75.863329° E	22.226704° N, 75.863329° E	22.226704° N, 75.863329° E	22.226704° N, 75.863329° E	22.226704° N, 75.863329° E	22.226704° N, 75.863329° E	22.226704° N, 75.863329° E	22.226704° N, 75.863329° E	22.226704° N, 75.863329° E	22.226704° N, 75.863329° E	22.226704° N, 75.863329° E	22.226704° N, 75.863329° E	26.36539° N, 70.42584° E	26.36539° N, 70.42584° E	26.36539° N, 70.42584° E	26.36539° N, 70.42584° E	26.36539° N, 70.42584° E	26.36539° N, 70.42584° E	26.36539° N, 70.42584° E	26.36539° N, 70.42584° E	26.36539° N, 70.42584° E	26.36539° N, 70.42584° E	34.425960°N 76.824421°E	34.425960°N 76.824421°E	34.425960°N 76.824421°E	34.425960°N 76.824421°E	34.425960°N 76.824421°E	34.425960°N 76.824421°E	34.425960°N 76.824421°E	34.425960°N 76.824421°E	34.425960°N 76.824421°E
	N.A.= Not Applicable
	N.K.= Not Known
